# Supplementary material for: Adaptive modulation of brain hemodynamics across stereotyped running episodes
Source: PubMed Central journal article supplement (PMC7713412; doi:10.1038/s41467-020-19948-7), 2020-12-03
Supplement: 41467_2020_19948_MOESM3_ESM.pdf [file 41467_2020_19948_MOESM3_ESM.pdf]

### **List of Supplementary Movies**

**Supplementary Movie 1:** Dynamic activation sequence associated with locomotion in posterior brain regions at 10 milliseconds resolution (Coronal plane – Bregma -4.0mm)

**Supplementary Movie 2:** Dynamic activation sequence associated with locomotion across the full hippocampus at 10 milliseconds resolution (Diagonal plane – Delta = 45°)

**Supplementary Movie 3:** Dynamic inhibition/activation sequence associated with locomotion in the primary motor cortex (Coronal plane – AP = +3.0mm)

**Supplementary Movie 4:** Early-Mid-Late single runs acquired during locomotion in posterior brain regions (Coronal plane – Bregma -4.0mm – Rat 1)

**Supplementary Movie 5:** Early-Mid-Late single runs acquired during locomotion in posterior brain regions (Coronal plane – Bregma -4.0mm – Rat 2)

**Supplementary Movie 6:** Early-Mid-Late single runs acquired during locomotion in anterior brain regions (Coronal plane – Bregma +3.0mm – Rat 3)
